# Supplementary material
Source: PubMed Central journal article supplement (PMC6386458)
Supplement: NIHMS1006282-supplement-1.pdf [file NIHMS1006282-supplement-1.pdf]

SUPPORTING TABLE 1. Cervical cancer: number of cases for females (15-99 years) diagnosed 2001-2009 and distribution (%) by SEER Summary Stage 2000 at diagnosis, by race, calendar period of diagnosis, and US Census Region and States.

| Location              | Stage           | 2001-2003 |        |        | 2004-2009 |        |        |
|-----------------------|-----------------|-----------|--------|--------|-----------|--------|--------|
|                       |                 | All Races | Whites | Blacks | All Races | Whites | Blacks |
| <b>UNITED STATES</b>  | No. of patients | 30,357    | 23,547 | 4882   | 60,263    | 46,563 | 9576   |
|                       | Localized, %    | 48.8      | 50.4   | 40.9   | 44.7      | 46.2   | 36.6   |
|                       | Regional, %     | 31.8      | 31.2   | 35.6   | 35.5      | 35.0   | 38.6   |
|                       | Distant, %      | 9.6       | 9.4    | 11.0   | 11.5      | 11.3   | 13.5   |
|                       | Unknown, %      | 9.8       | 9.0    | 12.5   | 8.4       | 7.5    | 11.3   |
| <b>NORTHEAST</b>      |                 |           |        |        |           |        |        |
| <b>New England</b>    |                 |           |        |        |           |        |        |
| Connecticut           | No. of patients | 378       | 313    | 54     | 711       | 598    | 82     |
| (SEER)                | Localized, %    | 46.0      | 50.2   | 22.2   | 49.4      | 48.0   | 50.0   |
|                       | Regional, %     | 37.6      | 33.5   | 59.3   | 34.3      | 34.8   | 39.0   |
|                       | Distant, %      | 12.4      | 12.5   | 14.8   | 11.7      | 12.5   | 8.5    |
|                       | Unknown, %      | 4.0       | 3.8    | 3.7    | 4.6       | 4.7    | 2.4    |
| Massachusetts         | No. of patients | 641       | 552    | 49     | 1240      | 1058   | 109    |
| (NPCR)                | Localized, %    | 55.7      | 54.9   | 61.2   | 52.4      | 52.5   | 44.0   |
|                       | Regional, %     | 32.6      | 33.5   | 30.6   | 31.0      | 31.3   | 35.8   |
|                       | Distant, %      | 7.6       | 7.8    | 6.1    | 12.3      | 12.5   | 12.8   |
|                       | Unknown, %      | 4.1       | 3.8    | 2.0    | 4.3       | 3.8    | 7.3    |
| New Hampshire         | No. of patients | 143       | 142    | —      | 245       | 237    | —      |
| (NPCR)                | Localized, %    | 49.7      | 49.3   | —      | 48.6      | 48.9   | 33.3   |
|                       | Regional, %     | 33.6      | 33.8   | —      | 35.9      | 37.1   | 0.0    |
|                       | Distant, %      | 9.8       | 9.9    | —      | 10.6      | 9.7    | 66.7   |
|                       | Unknown, %      | 7.0       | 7.0    | —      | 4.9       | 4.2    | 0.0    |
| Rhode Island          | No. of patients | 118       | 108    | —      | 269       | 225    | 22     |
| (NPCR)                | Localized, %    | 68.6      | 70.4   | 33.3   | —         | —      | —      |
|                       | Regional, %     | 20.3      | 18.5   | 66.7   | —         | —      | —      |
|                       | Distant, %      | 6.8       | 7.4    | 0.0    | —         | —      | —      |
|                       | Unknown, %      | 4.2       | 3.7    | 0.0    | —         | —      | —      |
| <b>Mid Atlantic</b>   |                 |           |        |        |           |        |        |
| New Jersey            | No. of patients | 1329      | 1013   | 241    | 2495      | 1876   | 478    |
| (NPCR/SEER)           | Localized, %    | 43.7      | 44.3   | 35.7   | 44.0      | 45.8   | 36.8   |
|                       | Regional, %     | 35.7      | 36.1   | 38.6   | 37.6      | 36.5   | 42.3   |
|                       | Distant, %      | 12.5      | 11.9   | 15.8   | 11.2      | 11.5   | 11.5   |
|                       | Unknown, %      | 8.1       | 7.6    | 10.0   | 7.1       | 6.2    | 9.4    |
| New York              | No. of patients | 2729      | 1826   | 687    | 5218      | 3496   | 1257   |
| (NPCR)                | Localized, %    | 44.2      | 46.8   | 38.1   | 42.2      | 43.6   | 36.3   |
|                       | Regional, %     | 31.3      | 30.3   | 36.1   | 37.8      | 36.8   | 42.9   |
|                       | Distant, %      | 8.9       | 8.8    | 10.2   | 10.9      | 10.9   | 12.4   |
|                       | Unknown, %      | 15.6      | 14.1   | 15.6   | 9.1       | 8.7    | 8.4    |
| Pennsylvania          | No. of patients | 1578      | 1313   | 216    | 3159      | 2602   | 407    |
| (NPCR)                | Localized, %    | 51.6      | 52.4   | 47.2   | 43.6      | 44.5   | 37.8   |
|                       | Regional, %     | 32.5      | 31.8   | 38.0   | 37.9      | 37.4   | 40.5   |
|                       | Distant, %      | 9.8       | 9.4    | 11.6   | 13.9      | 14.0   | 16.5   |
|                       | Unknown, %      | 6.0       | 6.3    | 3.2    | 4.6       | 4.1    | 5.2    |
| <b>SOUTH</b>          |                 |           |        |        |           |        |        |
| <b>South Atlantic</b> |                 |           |        |        |           |        |        |
| Delaware              | No. of patients | 105       | 78     | 25     | 243       | 174    | 60     |
| (NPCR)                | Localized, %    | 57.1      | 55.1   | 68.0   | 51.4      | 50.0   | 53.3   |
|                       | Regional, %     | 29.5      | 33.3   | 20.0   | 31.3      | 33.3   | 30.0   |
|                       | Distant, %      | 5.7       | 5.1    | 8.0    | 14.0      | 13.8   | 11.7   |
|                       | Unknown, %      | 7.6       | 6.4    | 4.0    | 3.3       | 2.9    | 5.0    |
| Florida               | No. of patients | 2741      | 2192   | 480    | 5346      | 4227   | 942    |
| (NPCR)                | Localized, %    | 45.5      | 47.4   | 36.5   | 42.8      | 44.3   | 34.3   |
|                       | Regional, %     | 35.0      | 33.5   | 41.3   | 38.3      | 37.6   | 41.6   |
|                       | Distant, %      | 9.9       | 9.5    | 12.3   | 11.9      | 11.2   | 15.8   |
|                       | Unknown, %      | 9.6       | 9.5    | 10.0   | 7.1       | 6.8    | 8.3    |
| Georgia               | No. of patients | 1225      | 787    | 400    | 2279      | 1453   | 754    |
| (NPCR/SEER)           | Localized, %    | 47.8      | 50.3   | 42.5   | 45.7      | 49.6   | 38.1   |
|                       | Regional, %     | 36.7      | 33.2   | 43.8   | 39.5      | 37.3   | 43.6   |
|                       | Distant, %      | 9.8       | 10.0   | 9.5    | 11.3      | 9.7    | 14.7   |
|                       | Unknown, %      | 5.6       | 6.5    | 4.3    | 3.6       | 3.4    | 3.6    |
| Maryland              | No. of patients | 606       | 358    | 205    | 1117      | 659    | 362    |

|                           |                 |      |      |      |      |      |      |
|---------------------------|-----------------|------|------|------|------|------|------|
| (NPCR)                    | Localized, %    | —    | —    | —    | —    | —    | —    |
|                           | Regional, %     | —    | —    | —    | —    | —    | —    |
|                           | Distant, %      | —    | —    | —    | —    | —    | —    |
|                           | Unknown, %      | —    | —    | —    | —    | —    | —    |
| North Carolina            | No. of patients | 980  | 668  | 266  | 2162 | 1510 | 565  |
| (NPCR)                    | Localized, %    | 55.0 | 57.3 | 47.7 | 49.9 | 52.8 | 43.5 |
|                           | Regional, %     | 32.7 | 31.7 | 35.0 | 35.0 | 32.8 | 39.1 |
|                           | Distant, %      | 8.5  | 7.5  | 11.7 | 11.3 | 10.7 | 13.5 |
|                           | Unknown, %      | 3.9  | 3.4  | 5.6  | 3.8  | 3.6  | 3.9  |
| South Carolina            | No. of patients | 614  | 370  | 231  | 1143 | 712  | 392  |
| (NPCR)                    | Localized, %    | 59.4 | 62.2 | 54.5 | 45.8 | 48.6 | 40.1 |
|                           | Regional, %     | 27.2 | 24.3 | 32.0 | 36.2 | 36.0 | 38.0 |
|                           | Distant, %      | 6.4  | 6.2  | 6.9  | 9.7  | 8.8  | 12.0 |
|                           | Unknown, %      | 7.0  | 7.3  | 6.5  | 8.2  | 6.6  | 9.9  |
| West Virginia             | No. of patients | 310  | 298  | 10   | 563  | 529  | 18   |
| (NPCR)                    | Localized, %    | 51.9 | 53.4 | 20.0 | 44.2 | 44.6 | 44.4 |
|                           | Regional, %     | 24.8 | 23.8 | 40.0 | 36.6 | 35.7 | 44.4 |
|                           | Distant, %      | 9.7  | 9.1  | 30.0 | 13.3 | 13.4 | 11.1 |
|                           | Unknown, %      | 13.5 | 13.8 | 10.0 | 5.9  | 6.2  | 0.0  |
| <b>East South Central</b> |                 |      |      |      |      |      |      |
| Alabama                   | No. of patients | 683  | 437  | 230  | 1223 | 820  | 370  |
| (NPCR)                    | Localized, %    | 50.1 | 52.9 | 45.7 | 44.0 | 47.7 | 36.5 |
|                           | Regional, %     | 35.6 | 35.2 | 36.5 | 41.5 | 38.9 | 47.6 |
|                           | Distant, %      | 9.7  | 8.0  | 13.0 | 9.8  | 8.8  | 12.7 |
|                           | Unknown, %      | 4.7  | 3.9  | 4.8  | 4.7  | 4.6  | 3.2  |
| Kentucky                  | No. of patients | 649  | 571  | 66   | 1206 | 1087 | 96   |
| (NPCR/SEER)               | Localized, %    | 50.1 | 51.5 | 39.4 | 47.3 | 47.8 | 36.5 |
|                           | Regional, %     | 33.0 | 32.6 | 39.4 | 36.1 | 35.9 | 42.7 |
|                           | Distant, %      | 9.9  | 9.5  | 15.2 | 12.7 | 12.5 | 16.7 |
|                           | Unknown, %      | 7.1  | 6.5  | 6.1  | 3.9  | 3.8  | 4.2  |
| Mississippi               | No. of patients | 123  | 63   | 58   | 842  | 441  | 382  |
| (NPCR)                    | Localized, %    | 52.8 | 60.3 | 44.8 | 40.6 | 43.8 | 36.1 |
|                           | Regional, %     | 23.6 | 25.4 | 20.7 | 38.0 | 37.0 | 39.8 |
|                           | Distant, %      | 13.8 | 11.1 | 17.2 | 14.5 | 13.6 | 16.0 |
|                           | Unknown, %      | 9.8  | 3.2  | 17.2 | 6.9  | 5.7  | 8.1  |
| Tennessee                 | No. of patients | 247  | 192  | 51   | 1674 | 1301 | 320  |
| (NPCR)                    | Localized, %    | 52.6 | 53.6 | 47.1 | 46.9 | 49.3 | 37.5 |
|                           | Regional, %     | 34.8 | 34.9 | 35.3 | 38.4 | 37.4 | 41.9 |
|                           | Distant, %      | 10.5 | 10.4 | 11.8 | 10.4 | 9.8  | 12.8 |
|                           | Unknown, %      | 2.0  | 1.0  | 5.9  | 4.4  | 3.5  | 7.8  |
| <b>West South Central</b> |                 |      |      |      |      |      |      |
| Louisiana                 | No. of patients | 661  | 367  | 283  | 1273 | 730  | 529  |
| (NPCR/SEER)               | Localized, %    | 50.4 | 56.1 | 43.1 | 45.2 | 48.1 | 40.8 |
|                           | Regional, %     | 33.9 | 31.9 | 36.0 | 38.4 | 37.9 | 39.5 |
|                           | Distant, %      | 11.3 | 7.9  | 16.3 | 11.1 | 8.5  | 14.6 |
|                           | Unknown, %      | 4.4  | 4.1  | 4.6  | 5.3  | 5.5  | 5.1  |
| Oklahoma                  | No. of patients | 527  | 410  | 47   | 1031 | 811  | 61   |
| (NPCR)                    | Localized, %    | 54.3 | 55.6 | 48.9 | 40.3 | 41.8 | 19.7 |
|                           | Regional, %     | 29.2 | 28.3 | 36.2 | 33.8 | 32.6 | 42.6 |
|                           | Distant, %      | 11.2 | 10.7 | 12.8 | 17.0 | 18.1 | 19.7 |
|                           | Unknown, %      | 5.3  | 5.4  | 2.1  | 9.0  | 7.5  | 18.0 |
| Texas                     | No. of patients | 3278 | 2721 | 451  | 6428 | 5370 | 831  |
| (NPCR)                    | Localized, %    | 48.4 | 48.9 | 43.2 | 43.4 | 44.5 | 35.0 |
|                           | Regional, %     | 29.7 | 29.5 | 32.2 | 34.5 | 34.2 | 38.6 |
|                           | Distant, %      | 8.3  | 8.4  | 9.5  | 10.4 | 9.8  | 14.8 |
|                           | Unknown, %      | 13.6 | 13.2 | 15.1 | 11.8 | 11.5 | 11.6 |
| <b>MIDWEST</b>            |                 |      |      |      |      |      |      |
| <b>East North Central</b> |                 |      |      |      |      |      |      |
| Michigan                  | No. of patients | 1262 | 954  | 252  | 2214 | 1694 | 428  |
| (NPCR/SEER)               | Localized, %    | 48.3 | 50.0 | 42.9 | 45.8 | 48.2 | 35.5 |
|                           | Regional, %     | 28.4 | 26.4 | 37.7 | 26.9 | 26.7 | 28.7 |
|                           | Distant, %      | 9.5  | 9.5  | 10.3 | 10.7 | 9.8  | 15.9 |
|                           | Unknown, %      | 13.8 | 14.0 | 9.1  | 16.7 | 15.3 | 19.9 |
| Ohio                      | No. of patients | 1439 | 1220 | 171  | 2840 | 2391 | 361  |
| (NPCR)                    | Localized, %    | 52.0 | 52.7 | 43.9 | 44.3 | 44.4 | 39.6 |
|                           | Regional, %     | 29.3 | 29.1 | 34.5 | 38.9 | 39.3 | 40.4 |
|                           | Distant, %      | 8.1  | 8.0  | 9.9  | 11.3 | 11.3 | 13.0 |

|                           |                 |      |      |       |      |      |       |
|---------------------------|-----------------|------|------|-------|------|------|-------|
|                           | Unknown, %      | 10.6 | 10.2 | 11.7  | 5.5  | 5.0  | 6.9   |
| Wisconsin                 | No. of patients | 543  | 475  | 47    | 1021 | 870  | 91    |
| (NPCR)                    | Localized, %    | —    | —    | —     | —    | —    | —     |
|                           | Regional, %     | —    | —    | —     | —    | —    | —     |
|                           | Distant, %      | —    | —    | —     | —    | —    | —     |
|                           | Unknown, %      | —    | —    | —     | —    | —    | —     |
| <b>West North Central</b> |                 |      |      |       |      |      |       |
| Iowa                      | No. of patients | 343  | 327  | —     | 610  | 569  | 20    |
| (SEER)                    | Localized, %    | 48.7 | 48.6 | 40.0  | 45.7 | 44.8 | 55.0  |
|                           | Regional, %     | 32.7 | 32.4 | 40.0  | 38.4 | 38.5 | 40.0  |
|                           | Distant, %      | 13.7 | 13.8 | 20.0  | 12.3 | 13.0 | 0.0   |
|                           | Unknown, %      | 5.0  | 5.2  | 0.0   | 3.6  | 3.7  | 5.0   |
| Nebraska                  | No. of patients | 241  | 219  | —     | 440  | 411  | 13    |
| (NPCR)                    | Localized, %    | 51.5 | 53.0 | 33.3  | 44.5 | 44.8 | 30.8  |
|                           | Regional, %     | 34.9 | 34.2 | 33.3  | 38.2 | 38.2 | 30.8  |
|                           | Distant, %      | 10.0 | 10.0 | 11.1  | 12.3 | 12.4 | 23.1  |
|                           | Unknown, %      | 3.7  | 2.7  | 22.2  | 5.0  | 4.6  | 15.4  |
| <b>WEST</b>               |                 |      |      |       |      |      |       |
| <b>Mountain</b>           |                 |      |      |       |      |      |       |
| Colorado                  | No. of patients | 483  | 438  | 16    | 925  | 826  | 39    |
| (NPCR)                    | Localized, %    | 54.9 | 55.3 | 31.3  | 52.0 | 51.6 | 51.3  |
|                           | Regional, %     | 29.8 | 30.1 | 43.8  | 29.6 | 30.4 | 30.8  |
|                           | Distant, %      | 9.1  | 9.1  | 18.8  | 14.1 | 14.9 | 7.7   |
|                           | Unknown, %      | 6.2  | 5.5  | 6.3   | 4.3  | 3.1  | 10.3  |
| Idaho                     | No. of patients | 131  | 125  | —     | 254  | 245  | —     |
| (NPCR)                    | Localized, %    | 54.2 | 54.4 | —     | 47.6 | 48.6 | 0.0   |
|                           | Regional, %     | 32.1 | 31.2 | —     | 35.4 | 35.1 | 100.0 |
|                           | Distant, %      | 9.2  | 9.6  | —     | 13.4 | 13.5 | 0.0   |
|                           | Unknown, %      | 4.6  | 4.8  | —     | 3.5  | 2.9  | 0.0   |
| Montana                   | No. of patients | 110  | 99   | —     | 177  | 155  | —     |
| (NPCR)                    | Localized, %    | 50.9 | 50.5 | —     | 50.8 | 50.3 | 100.0 |
|                           | Regional, %     | 40.9 | 41.4 | —     | 33.3 | 32.9 | 0.0   |
|                           | Distant, %      | 4.5  | 5.1  | —     | 14.7 | 15.5 | 0.0   |
|                           | Unknown, %      | 3.6  | 3.0  | —     | 1.1  | 1.3  | 0.0   |
| New Mexico                | No. of patients | 241  | 210  | —     | 470  | 418  | —     |
| (SEER)                    | Localized, %    | 50.6 | 52.4 | 33.3  | 45.7 | 47.1 | 20.0  |
|                           | Regional, %     | 32.8 | 29.5 | 66.7  | 37.2 | 37.1 | 40.0  |
|                           | Distant, %      | 9.5  | 10.5 | 0.0   | 11.7 | 11.2 | 40.0  |
|                           | Unknown, %      | 7.1  | 7.6  | 0.0   | 5.3  | 4.5  | 0.0   |
| Utah                      | No. of patients | 174  | 164  | —     | 356  | 341  | —     |
| (SEER)                    | Localized, %    | 56.9 | 57.3 | 0.0   | 52.5 | 53.4 | 0.0   |
|                           | Regional, %     | 31.6 | 31.1 | 100.0 | 37.6 | 36.7 | 100.0 |
|                           | Distant, %      | 9.8  | 9.8  | 0.0   | 9.0  | 9.1  | 0.0   |
|                           | Unknown, %      | 1.7  | 1.8  | 0.0   | 0.8  | 0.9  | 0.0   |
| Wyoming                   | No. of patients | 61   | 60   | —     | 127  | 122  | —     |
| (NPCR)                    | Localized, %    | 49.2 | 50.0 | 0.0   | 52.8 | 52.5 | 100.0 |
|                           | Regional, %     | 36.1 | 35.0 | 100.0 | 32.3 | 32.8 | 0.0   |
|                           | Distant, %      | 8.2  | 8.3  | 0.0   | 11.8 | 11.5 | 0.0   |
|                           | Unknown, %      | 6.6  | 6.7  | 0.0   | 3.1  | 3.3  | 0.0   |
| <b>Pacific</b>            |                 |      |      |       |      |      |       |
| Alaska                    | No. of patients | 65   | 46   | —     | 156  | 101  | —     |
| (NPCR)                    | Localized, %    | 55.4 | 58.7 | 75.0  | 51.9 | 53.5 | 0.0   |
|                           | Regional, %     | 30.8 | 32.6 | 25.0  | 30.1 | 28.7 | 50.0  |
|                           | Distant, %      | 6.2  | 4.3  | 0.0   | 11.5 | 12.9 | 0.0   |
|                           | Unknown, %      | 7.7  | 4.3  | 0.0   | 6.4  | 5.0  | 50.0  |
| California                | No. of patients | 4431 | 3521 | 288   | 8654 | 6806 | 523   |
| (NPCR/SEER)               | Localized, %    | 49.8 | 50.6 | 44.1  | 48.1 | 49.1 | 41.7  |
|                           | Regional, %     | 34.8 | 34.4 | 38.2  | 36.1 | 35.8 | 36.7  |
|                           | Distant, %      | 12.2 | 12.2 | 13.2  | 12.5 | 12.2 | 16.8  |
|                           | Unknown, %      | 3.2  | 2.8  | 4.5   | 3.3  | 2.9  | 4.8   |
| Hawaii                    | No. of patients | 160  | 36   | —     | 305  | 75   | —     |
| (SEER)                    | Localized, %    | 61.9 | 69.4 | 100.0 | 53.1 | 54.7 | 100.0 |
|                           | Regional, %     | 25.0 | 13.9 | 0.0   | 33.1 | 30.7 | 0.0   |
|                           | Distant, %      | 12.5 | 16.7 | 0.0   | 10.5 | 10.7 | 0.0   |
|                           | Unknown, %      | 0.6  | 0.0  | 0.0   | 3.3  | 4.0  | 0.0   |
| Oregon                    | No. of patients | 382  | 343  | 11    | 776  | 692  | 17    |
| (NPCR)                    | Localized, %    | 55.2 | 56.6 | 36.4  | 47.8 | 47.4 | 41.2  |

|                           |                 |      |      |      |      |      |      |
|---------------------------|-----------------|------|------|------|------|------|------|
|                           | Regional, %     | 34.0 | 32.9 | 45.5 | 36.1 | 36.1 | 52.9 |
|                           | Distant, %      | 8.4  | 8.2  | 18.2 | 12.5 | 12.7 | 5.9  |
|                           | Unknown, %      | 2.4  | 2.3  | 0.0  | 3.6  | 3.8  | 0.0  |
| Washington<br>(NPCR/SEER) | No. of patients | 626  | 531  | 20   | 1071 | 931  | 26   |
|                           | Localized, %    | 56.1 | 56.3 | 60.0 | 48.0 | 48.4 | 53.8 |
|                           | Regional, %     | 32.4 | 31.6 | 35.0 | 35.3 | 34.5 | 26.9 |
|                           | Distant, %      | 9.4  | 9.8  | 5.0  | 14.4 | 14.8 | 11.5 |
|                           | Unknown, %      | 2.1  | 2.3  | 0.0  | 2.3  | 2.3  | 7.7  |

Note: NPCR indicates National Program of Cancer Registries; SEER indicates Surveillance, Epidemiology, and End Results program. Information on stage was not available for two states (Maryland and Wisconsin), or for Rhode Island for cases diagnosed between 2004-2009. This is the same information that appears in Table 1.

**SUPPORTING TABLE 2. Cervical cancer: age-standardized net survival (%) at 1-, 3- and 5-years for females (15-99 years) diagnosed 2001-2009, by race, calendar period of diagnosis, and US Census Region and States.**

| Location                  | Years | 2001-2003   |           |             |           |             |            | 2004-2009   |           |             |           |
|---------------------------|-------|-------------|-----------|-------------|-----------|-------------|------------|-------------|-----------|-------------|-----------|
|                           |       | All Races   |           | Whites      |           | Blacks      |            | All Races   |           | Whites      |           |
|                           |       | NS (%)      | 95% CI    | NS (%)      | 95% CI    | NS (%)      | 95% CI     | NS (%)      | 95% CI    | NS (%)      | 95% CI    |
| <b>UNITED STATES</b>      | 1     | <b>83.4</b> | 82.9-83.9 | <b>83.8</b> | 83.3-84.4 | <b>79.0</b> | 77.7-80.2  | <b>82.9</b> | 82.5-83.3 | <b>83.0</b> | 82.6-83.4 |
|                           | 3     | <b>68.7</b> | 68.0-69.3 | <b>69.2</b> | 68.5-69.9 | <b>61.8</b> | 60.2-63.3  | <b>68.0</b> | 67.5-68.5 | <b>68.7</b> | 68.1-69.3 |
|                           | 5     | <b>63.5</b> | 62.8-64.1 | <b>64.0</b> | 63.2-64.7 | <b>56.6</b> | 55.0-58.2  | <b>62.8</b> | 62.2-63.5 | <b>63.5</b> | 62.7-64.3 |
| <b>NORTHEAST</b>          |       |             |           |             |           |             |            |             |           |             |           |
| <b>New England</b>        |       |             |           |             |           |             |            |             |           |             |           |
| Connecticut<br>(SEER)     | 1     | <b>85.7</b> | 81.9-89.5 | <b>85.5</b> | 81.3-89.8 | <b>83.8</b> | 73.6-94.1  | <b>84.3</b> | 81.3-87.3 | <b>82.8</b> | 79.4-86.2 |
|                           | 3     | <b>70.4</b> | 65.3-75.4 | <b>69.7</b> | 64.2-75.2 | <b>71.7</b> | 58.2-85.2  | <b>69.5</b> | 65.2-73.8 | <b>68.4</b> | 63.8-73.0 |
|                           | 5     | <b>61.8</b> | 56.3-67.3 | <b>63.1</b> | 57.1-69.1 | <b>49.4</b> | 33.8-65.0  | <b>64.1</b> | 59.1-69.1 | <b>62.4</b> | 56.9-67.7 |
| Massachusetts<br>(NPCR)   | 1     | <b>88.6</b> | 85.8-91.4 | <b>87.0</b> | 83.8-90.2 | <b>98.4</b> | 94.4-100.0 | <b>83.8</b> | 81.4-86.2 | <b>82.4</b> | 79.7-85.1 |
|                           | 3     | <b>76.9</b> | 73.1-80.6 | <b>74.6</b> | 70.5-78.7 | <b>84.7</b> | 73.8-95.7  | <b>72.3</b> | 69.2-75.5 | <b>70.5</b> | 67.1-74.0 |
|                           | 5     | <b>71.8</b> | 67.6-75.9 | <b>68.5</b> | 64.1-73.0 | <b>82.5</b> | 69.5-95.4  | <b>67.6</b> | 63.6-71.6 | <b>65.1</b> | 60.8-69.4 |
| New Hampshire<br>(NPCR)   | 1     | <b>77.7</b> | 71.3-84.1 | <b>77.7</b> | 71.3-84.1 | —           | —          | <b>86.6</b> | 81.2-92.1 | <b>86.8</b> | 81.3-92.3 |
|                           | 3     | <b>66.8</b> | 59.9-73.7 | <b>66.8</b> | 59.9-73.7 | —           | —          | <b>71.9</b> | 64.5-79.4 | <b>72.3</b> | 64.8-79.8 |
|                           | 5     | <b>70.4</b> | 61.0-79.9 | <b>70.4</b> | 60.9-79.8 | —           | —          | <b>65.1</b> | 56.4-73.9 | <b>65.4</b> | 56.6-74.2 |
| Rhode Island<br>(NPCR)    | 1     | <b>94.7</b> | 90.5-99.0 | <b>94.2</b> | 89.6-98.9 | —           | —          | <b>86.8</b> | 81.9-91.8 | <b>85.2</b> | 79.7-90.7 |
|                           | 3     | <b>81.9</b> | 74.5-89.3 | <b>80.1</b> | 72.1-88.1 | —           | —          | <b>77.2</b> | 70.6-83.8 | <b>74.0</b> | 66.6-81.4 |
|                           | 5     | <b>77.5</b> | 69.3-85.8 | <b>77.2</b> | 68.5-85.9 | —           | —          | <b>73.9</b> | 65.7-82.0 | <b>71.7</b> | 63.4-80.0 |
| <b>Mid Atlantic</b>       |       |             |           |             |           |             |            |             |           |             |           |
| New Jersey<br>(NPCR/SEER) | 1     | <b>82.3</b> | 79.9-84.7 | <b>82.8</b> | 80.1-85.4 | <b>77.7</b> | 72.2-83.3  | <b>83.0</b> | 81.3-84.8 | <b>83.1</b> | 81.1-85.1 |
|                           | 3     | <b>66.1</b> | 63.2-69.0 | <b>67.1</b> | 63.8-70.4 | <b>58.0</b> | 51.2-64.8  | <b>67.8</b> | 65.4-70.2 | <b>69.6</b> | 66.8-72.4 |
|                           | 5     | <b>61.3</b> | 58.2-64.4 | <b>62.2</b> | 58.8-65.7 | <b>52.4</b> | 45.2-59.5  | <b>63.0</b> | 60.0-66.0 | <b>64.5</b> | 61.0-68.0 |
| New York<br>(NPCR)        | 1     | <b>84.2</b> | 82.7-85.7 | <b>84.0</b> | 82.2-85.9 | <b>82.0</b> | 78.9-85.0  | <b>85.1</b> | 84.0-86.2 | <b>84.4</b> | 83.0-85.8 |
|                           | 3     | <b>69.8</b> | 67.9-71.7 | <b>68.9</b> | 66.6-71.3 | <b>66.3</b> | 62.5-70.2  | <b>71.5</b> | 70.0-73.1 | <b>71.1</b> | 69.2-73.0 |
|                           | 5     | <b>65.2</b> | 63.2-67.3 | <b>63.4</b> | 60.9-65.9 | <b>62.8</b> | 58.7-66.9  | <b>67.0</b> | 65.0-69.0 | <b>67.4</b> | 65.0-69.8 |
| Pennsylvania<br>(NPCR)    | 1     | <b>83.7</b> | 81.6-85.9 | <b>84.7</b> | 82.4-87.0 | <b>75.1</b> | 68.6-81.7  | <b>82.4</b> | 80.8-83.9 | <b>82.5</b> | 80.7-84.3 |
|                           | 3     | <b>66.8</b> | 64.1-69.4 | <b>67.6</b> | 64.7-70.4 | <b>58.2</b> | 51.1-65.4  | <b>67.9</b> | 65.8-70.0 | <b>68.0</b> | 65.7-70.3 |
|                           | 5     | <b>60.1</b> | 57.3-62.9 | <b>61.1</b> | 58.0-64.1 | <b>50.0</b> | 42.7-57.3  | <b>62.6</b> | 60.0-65.3 | <b>62.9</b> | 60.1-65.7 |
| <b>SOUTH</b>              |       |             |           |             |           |             |            |             |           |             |           |
| <b>South Atlantic</b>     |       |             |           |             |           |             |            |             |           |             |           |
| Delaware<br>(NPCR)        | 1     | <b>83.8</b> | 76.9-90.7 | <b>81.5</b> | 73.3-89.7 | <b>92.4</b> | 81.7-100.0 | <b>89.0</b> | 84.3-93.7 | <b>89.0</b> | 83.2-94.8 |
|                           | 3     | <b>70.6</b> | 61.8-79.3 | <b>67.5</b> | 57.4-77.5 | <b>77.7</b> | 60.9-94.4  | <b>75.3</b> | 67.7-83.0 | <b>77.3</b> | 68.3-86.3 |
|                           | 5     | <b>59.0</b> | 49.7-68.3 | <b>53.8</b> | 43.5-64.1 | <b>74.1</b> | 56.5-91.8  | <b>64.8</b> | 56.9-72.7 | <b>63.3</b> | 53.9-72.7 |
| Florida<br>(NPCR)         | 1     | <b>84.2</b> | 82.7-85.7 | <b>84.5</b> | 82.8-86.2 | <b>81.5</b> | 77.7-85.4  | <b>84.1</b> | 82.9-85.2 | <b>84.5</b> | 83.1-85.9 |
|                           | 3     | <b>69.1</b> | 67.1-71.0 | <b>69.4</b> | 67.3-71.6 | <b>65.1</b> | 60.3-69.9  | <b>71.2</b> | 69.6-72.8 | <b>71.6</b> | 69.8-73.4 |
|                           | 5     | <b>63.4</b> | 61.3-65.5 | <b>63.6</b> | 61.4-65.9 | <b>59.9</b> | 54.8-65.1  | <b>65.2</b> | 63.1-67.4 | <b>65.4</b> | 63.0-67.8 |
| Georgia<br>(NPCR/SEER)    | 1     | <b>82.9</b> | 80.4-85.5 | <b>84.6</b> | 81.3-87.8 | <b>79.6</b> | 75.2-84.1  | <b>80.7</b> | 78.7-82.7 | <b>82.4</b> | 79.8-85.0 |
|                           | 3     | <b>67.8</b> | 64.7-70.9 | <b>68.8</b> | 64.8-72.8 | <b>64.3</b> | 59.1-69.5  | <b>63.0</b> | 60.2-65.7 | <b>64.6</b> | 61.1-68.1 |
|                           | 5     | <b>61.5</b> | 58.2-64.8 | <b>61.6</b> | 57.4-65.7 | <b>59.0</b> | 53.5-64.6  | <b>56.0</b> | 52.6-59.5 | <b>58.1</b> | 54.0-62.2 |
| Maryland<br>(NPCR)        | 1     | <b>82.0</b> | 78.5-85.5 | <b>81.9</b> | 77.3-86.4 | <b>81.8</b> | 76.0-87.6  | <b>83.5</b> | 80.9-86.1 | <b>84.5</b> | 81.2-87.8 |
|                           | 3     | <b>67.1</b> | 62.9-71.4 | <b>65.8</b> | 60.4-71.3 | <b>64.7</b> | 57.5-72.0  | <b>67.9</b> | 64.2-71.5 | <b>70.2</b> | 65.7-74.7 |
|                           | 5     | <b>63.1</b> | 58.6-67.7 | <b>62.6</b> | 56.9-68.4 | <b>59.0</b> | 51.3-66.7  | <b>62.5</b> | 58.1-66.9 | <b>65.3</b> | 60.0-70.6 |
| North Carolina<br>(NPCR)  | 1     | <b>77.3</b> | 74.3-80.3 | <b>78.8</b> | 75.0-82.5 | <b>71.2</b> | 65.6-76.9  | <b>82.4</b> | 80.4-84.4 | <b>81.9</b> | 79.4-84.4 |
|                           | 3     | <b>67.2</b> | 63.7-70.6 | <b>68.6</b> | 64.3-72.9 | <b>61.0</b> | 54.7-67.3  | <b>66.6</b> | 64.0-69.3 | <b>67.9</b> | 64.7-71.1 |
|                           | 5     | <b>61.7</b> | 57.9-65.4 | <b>63.7</b> | 59.1-68.4 | <b>52.6</b> | 45.9-59.2  | <b>62.4</b> | 59.2-65.7 | <b>65.1</b> | 61.3-68.9 |
| South Carolina<br>(NPCR)  | 1     | <b>83.7</b> | 80.2-87.2 | <b>85.1</b> | 80.4-89.8 | <b>81.3</b> | 75.9-86.7  | <b>81.6</b> | 78.6-84.5 | <b>83.7</b> | 80.0-87.4 |
|                           | 3     | <b>66.7</b> | 62.3-71.1 | <b>69.1</b> | 63.2-75.1 | <b>61.6</b> | 54.9-68.2  | <b>66.2</b> | 62.3-70.1 | <b>70.8</b> | 65.7-76.0 |
|                           | 5     | <b>61.5</b> | 56.8-66.1 | <b>62.3</b> | 56.2-68.3 | <b>57.4</b> | 50.3-64.5  | <b>58.8</b> | 53.4-64.2 | <b>61.8</b> | 54.6-69.0 |
| West Virginia<br>(NPCR)   | 1     | <b>81.5</b> | 76.8-86.2 | <b>82.8</b> | 78.1-87.6 | <b>60.2</b> | 31.6-88.7  | <b>78.6</b> | 74.5-82.8 | <b>78.4</b> | 74.2-82.6 |
|                           | 3     | <b>66.1</b> | 60.5-71.8 | <b>67.6</b> | 61.8-73.4 | <b>30.6</b> | 4.5-56.6   | <b>63.6</b> | 58.2-68.9 | <b>63.2</b> | 57.8-68.6 |
|                           | 5     | <b>60.4</b> | 54.5-66.4 | <b>61.9</b> | 55.8-68.0 | <b>20.5</b> | 0.0-42.6   | <b>57.6</b> | 51.6-63.5 | <b>57.1</b> | 51.2-63.0 |

|                           |   |             |           |             |           |             |            |             |           |             |           |
|---------------------------|---|-------------|-----------|-------------|-----------|-------------|------------|-------------|-----------|-------------|-----------|
| <b>East South Central</b> |   |             |           |             |           |             |            |             |           |             |           |
| Alabama                   | 1 | <b>81.7</b> | 78.5-85.0 | <b>84.9</b> | 80.9-89.0 | <b>75.9</b> | 70.2-81.6  | <b>78.9</b> | 76.2-81.7 | <b>79.7</b> | 76.2-83.1 |
| (NPCR)                    | 3 | <b>66.4</b> | 62.4-70.4 | <b>70.7</b> | 65.5-75.9 | <b>58.8</b> | 52.3-65.2  | <b>61.9</b> | 58.3-65.6 | <b>64.1</b> | 59.5-68.8 |
|                           | 5 | <b>58.7</b> | 54.5-62.9 | <b>61.7</b> | 56.1-67.3 | <b>52.9</b> | 46.2-59.6  | <b>56.4</b> | 51.9-60.8 | <b>57.8</b> | 51.9-63.3 |
| Kentucky                  | 1 | <b>81.2</b> | 77.8-84.6 | <b>82.0</b> | 78.5-85.5 | <b>69.2</b> | 59.6-78.8  | <b>79.1</b> | 76.3-81.9 | <b>79.6</b> | 76.7-82.2 |
| (NPCR/SEER)               | 3 | <b>67.7</b> | 63.5-71.9 | <b>68.9</b> | 64.5-73.3 | <b>52.9</b> | 42.0-63.8  | <b>64.0</b> | 60.4-67.5 | <b>64.0</b> | 60.3-67.1 |
|                           | 5 | <b>63.9</b> | 59.4-68.3 | <b>65.5</b> | 60.9-70.1 | <b>43.8</b> | 32.9-54.7  | <b>60.9</b> | 56.7-65.1 | <b>60.4</b> | 56.0-64.1 |
| Mississippi               | 1 | <b>78.9</b> | 71.1-86.6 | <b>86.3</b> | 77.6-95.0 | <b>76.8</b> | 65.7-87.9  | <b>77.6</b> | 74.3-80.8 | <b>79.1</b> | 75.1-83.1 |
| (NPCR)                    | 3 | <b>65.0</b> | 56.1-73.8 | <b>81.2</b> | 71.0-91.4 | <b>61.2</b> | 48.1-74.3  | <b>59.9</b> | 55.6-64.1 | <b>65.3</b> | 60.0-70.7 |
|                           | 5 | <b>55.7</b> | 46.9-64.6 | <b>73.2</b> | 61.5-84.9 | <b>52.3</b> | 38.7-66.0  | <b>53.6</b> | 48.4-58.7 | <b>60.3</b> | 53.6-67.1 |
| Tennessee                 | 1 | <b>84.4</b> | 79.4-89.3 | <b>83.8</b> | 78.2-89.3 | <b>85.3</b> | 75.3-95.3  | <b>83.3</b> | 81.1-85.6 | <b>84.0</b> | 81.4-86.1 |
| (NPCR)                    | 3 | <b>67.0</b> | 60.7-73.3 | <b>69.1</b> | 62.3-75.9 | <b>59.1</b> | 45.1-73.1  | <b>66.3</b> | 63.2-69.5 | <b>69.3</b> | 65.7-72.2 |
|                           | 5 | <b>60.7</b> | 54.0-67.3 | <b>65.1</b> | 57.9-72.4 | <b>50.9</b> | 36.3-65.5  | <b>59.5</b> | 55.4-63.6 | <b>62.9</b> | 58.3-67.1 |
| <b>West South Central</b> |   |             |           |             |           |             |            |             |           |             |           |
| Louisiana                 | 1 | <b>79.5</b> | 75.7-83.2 | <b>81.6</b> | 76.5-86.8 | <b>74.8</b> | 69.1-80.5  | <b>79.2</b> | 76.3-82.0 | <b>81.3</b> | 77.6-85.1 |
| (NPCR/SEER)               | 3 | <b>64.5</b> | 60.1-68.9 | <b>69.0</b> | 63.0-75.1 | <b>57.4</b> | 50.9-63.9  | <b>60.4</b> | 56.5-64.2 | <b>64.1</b> | 59.2-69.1 |
|                           | 5 | <b>57.3</b> | 52.6-62.0 | <b>60.9</b> | 54.4-67.4 | <b>52.3</b> | 45.5-59.1  | <b>52.7</b> | 47.5-57.8 | <b>55.1</b> | 48.6-61.1 |
| Oklahoma                  | 1 | <b>81.3</b> | 77.2-85.4 | <b>80.0</b> | 75.4-84.7 | <b>86.1</b> | 75.9-96.3  | <b>80.0</b> | 77.0-82.9 | <b>80.7</b> | 77.5-83.1 |
| (NPCR)                    | 3 | <b>62.1</b> | 57.3-67.0 | <b>61.8</b> | 56.5-67.2 | <b>57.6</b> | 43.1-72.0  | <b>66.2</b> | 62.3-70.1 | <b>66.5</b> | 62.2-70.1 |
|                           | 5 | <b>58.7</b> | 53.4-64.0 | <b>59.0</b> | 53.2-64.7 | <b>52.5</b> | 37.6-67.4  | <b>64.0</b> | 58.8-69.2 | <b>64.7</b> | 58.9-70.1 |
| Texas                     | 1 | <b>83.5</b> | 82.0-85.1 | <b>84.2</b> | 82.5-86.0 | <b>77.5</b> | 73.3-81.7  | <b>82.8</b> | 81.6-84.0 | <b>83.7</b> | 82.4-85.1 |
| (NPCR)                    | 3 | <b>67.5</b> | 65.6-69.5 | <b>68.5</b> | 66.3-70.6 | <b>58.3</b> | 53.2-63.4  | <b>66.8</b> | 65.2-68.5 | <b>68.1</b> | 66.3-69.1 |
|                           | 5 | <b>63.5</b> | 61.4-65.6 | <b>64.0</b> | 61.6-66.3 | <b>56.0</b> | 50.4-61.7  | <b>62.8</b> | 60.7-64.9 | <b>63.8</b> | 61.5-66.1 |
| <b>MIDWEST</b>            |   |             |           |             |           |             |            |             |           |             |           |
| <b>East North Central</b> |   |             |           |             |           |             |            |             |           |             |           |
| Michigan                  | 1 | <b>81.8</b> | 79.3-84.3 | <b>83.0</b> | 80.2-85.8 | <b>76.1</b> | 70.1-82.1  | <b>77.8</b> | 75.7-80.0 | <b>78.7</b> | 76.2-81.1 |
| (NPCR)                    | 3 | <b>68.1</b> | 65.1-71.1 | <b>69.3</b> | 65.9-72.6 | <b>60.0</b> | 53.2-66.9  | <b>64.3</b> | 61.7-67.0 | <b>65.8</b> | 62.7-68.1 |
|                           | 5 | <b>64.4</b> | 61.1-67.6 | <b>65.5</b> | 61.8-69.1 | <b>55.0</b> | 48.0-62.0  | <b>59.9</b> | 56.7-63.1 | <b>60.7</b> | 57.0-64.1 |
| Ohio                      | 1 | <b>80.4</b> | 78.0-82.7 | <b>81.7</b> | 79.2-84.2 | <b>71.5</b> | 64.2-78.8  | <b>80.5</b> | 78.8-82.2 | <b>80.1</b> | 78.2-82.2 |
| (NPCR)                    | 3 | <b>65.1</b> | 62.3-67.9 | <b>66.6</b> | 63.6-69.7 | <b>51.9</b> | 44.2-59.6  | <b>64.3</b> | 62.0-66.5 | <b>64.9</b> | 62.4-67.1 |
|                           | 5 | <b>60.0</b> | 57.0-62.9 | <b>60.9</b> | 57.7-64.2 | <b>48.2</b> | 40.4-56.0  | <b>58.0</b> | 55.1-60.8 | <b>58.2</b> | 55.0-61.1 |
| Wisconsin                 | 1 | <b>86.7</b> | 83.2-90.2 | <b>87.4</b> | 83.7-91.1 | <b>83.8</b> | 73.1-94.5  | <b>85.4</b> | 82.6-88.2 | <b>85.2</b> | 82.1-88.1 |
| (NPCR)                    | 3 | <b>71.2</b> | 66.7-75.8 | <b>73.0</b> | 68.3-77.8 | <b>65.4</b> | 51.4-79.5  | <b>72.2</b> | 68.4-76.0 | <b>73.3</b> | 69.2-77.1 |
|                           | 5 | <b>67.8</b> | 63.0-72.6 | <b>70.1</b> | 65.1-75.1 | <b>59.9</b> | 45.2-74.5  | <b>66.6</b> | 61.4-71.7 | <b>66.0</b> | 60.0-72.1 |
| <b>West North Central</b> |   |             |           |             |           |             |            |             |           |             |           |
| Iowa                      | 1 | <b>80.4</b> | 75.8-84.9 | <b>79.9</b> | 75.2-84.7 | —           | —          | <b>85.7</b> | 82.4-89.1 | <b>85.6</b> | 82.1-89.1 |
| (SEER)                    | 3 | <b>65.9</b> | 60.4-71.3 | <b>65.2</b> | 59.6-70.7 | —           | —          | <b>69.1</b> | 64.0-74.2 | <b>69.2</b> | 64.0-74.1 |
|                           | 5 | <b>61.1</b> | 55.5-66.6 | <b>60.0</b> | 54.3-65.7 | —           | —          | <b>62.9</b> | 56.7-69.0 | <b>63.3</b> | 56.7-69.1 |
| Nebraska                  | 1 | <b>88.0</b> | 82.9-93.1 | <b>87.8</b> | 82.5-93.0 | —           | —          | <b>86.0</b> | 81.8-90.3 | <b>86.8</b> | 82.5-91.1 |
| (NPCR)                    | 3 | <b>68.1</b> | 61.3-75.0 | <b>68.3</b> | 61.3-75.3 | —           | —          | <b>72.7</b> | 67.0-78.3 | <b>73.5</b> | 67.9-79.1 |
|                           | 5 | <b>63.2</b> | 56.0-70.4 | <b>63.7</b> | 56.3-71.1 | —           | —          | <b>64.5</b> | 56.8-72.3 | <b>64.8</b> | 56.8-72.1 |
| <b>WEST</b>               |   |             |           |             |           |             |            |             |           |             |           |
| <b>Mountain</b>           |   |             |           |             |           |             |            |             |           |             |           |
| Colorado                  | 1 | <b>86.1</b> | 81.9-90.2 | <b>85.6</b> | 81.2-89.9 | <b>88.3</b> | 72.6-100.0 | <b>83.6</b> | 80.2-87.1 | <b>82.4</b> | 78.7-86.1 |
| (NPCR)                    | 3 | <b>73.6</b> | 68.6-78.7 | <b>73.3</b> | 68.0-78.6 | <b>64.1</b> | 40.5-87.7  | <b>69.4</b> | 65.1-73.7 | <b>68.2</b> | 63.7-72.1 |
|                           | 5 | <b>68.6</b> | 63.5-73.8 | <b>67.9</b> | 62.5-73.4 | <b>58.1</b> | 33.9-82.3  | <b>65.4</b> | 60.1-70.6 | <b>63.7</b> | 58.0-69.1 |
| Idaho                     | 1 | <b>83.5</b> | 76.3-90.7 | <b>82.6</b> | 75.2-90.1 | —           | —          | <b>85.8</b> | 80.6-91.1 | <b>86.2</b> | 80.9-91.1 |
| (NPCR)                    | 3 | <b>68.2</b> | 59.4-77.0 | <b>66.7</b> | 57.8-75.6 | —           | —          | <b>71.2</b> | 63.4-79.0 | <b>71.1</b> | 63.2-79.1 |
|                           | 5 | <b>64.8</b> | 55.9-73.7 | <b>63.9</b> | 54.9-72.9 | —           | —          | <b>68.3</b> | 59.4-77.2 | <b>68.0</b> | 58.9-77.1 |
| Montana                   | 1 | <b>89.8</b> | 83.3-96.3 | <b>89.8</b> | 83.1-96.6 | —           | —          | <b>88.0</b> | 82.6-93.5 | <b>88.8</b> | 83.2-94.1 |
| (NPCR)                    | 3 | <b>77.1</b> | 68.3-86.0 | <b>78.2</b> | 69.1-87.4 | —           | —          | <b>67.6</b> | 57.8-77.3 | <b>69.0</b> | 58.6-79.1 |
|                           | 5 | <b>64.9</b> | 55.1-74.7 | <b>67.1</b> | 56.8-77.3 | —           | —          | <b>63.7</b> | 53.7-73.7 | <b>63.4</b> | 52.8-73.1 |
| New Mexico                | 1 | <b>80.9</b> | 75.1-86.7 | <b>79.4</b> | 73.0-85.7 | —           | —          | <b>81.1</b> | 77.1-85.1 | <b>81.1</b> | 76.7-85.1 |
| (SEER)                    | 3 | <b>67.5</b> | 60.9-74.0 | <b>66.4</b> | 59.7-73.1 | —           | —          | <b>64.5</b> | 59.3-69.8 | <b>65.8</b> | 60.3-71.1 |
|                           | 5 | <b>61.7</b> | 54.8-68.5 | <b>59.9</b> | 53.0-66.9 | —           | —          | <b>53.7</b> | 46.5-60.9 | <b>56.0</b> | 48.3-63.1 |
| Utah                      | 1 | <b>82.1</b> | 74.7-89.4 | <b>81.9</b> | 74.3-89.5 | —           | —          | <b>78.8</b> | 73.3-84.2 | <b>78.8</b> | 73.2-84.1 |
| (SEER)                    | 3 | <b>67.7</b> | 59.6-75.8 | <b>67.7</b> | 59.4-76.0 | —           | —          | <b>64.4</b> | 57.7-71.0 | <b>66.1</b> | 59.3-72.1 |
|                           | 5 | <b>61.9</b> | 53.9-69.9 | <b>61.3</b> | 53.0-69.5 | —           | —          | <b>61.3</b> | 54.0-68.6 | <b>62.5</b> | 55.0-69.1 |
| Wyoming                   | 1 | <b>84.2</b> | 74.8-93.6 | <b>83.9</b> | 74.3-93.4 | —           | —          | <b>75.3</b> | 67.7-82.9 | <b>75.6</b> | 68.0-83.1 |
| (NPCR)                    | 3 | <b>74.3</b> | 62.7-85.9 | <b>73.5</b> | 61.8-85.2 | —           | —          | <b>60.9</b> | 51.3-70.4 | <b>62.0</b> | 52.4-71.1 |
|                           | 5 | <b>74.2</b> | 62.3-86.2 | <b>73.2</b> | 61.1-85.3 | —           | —          | <b>52.5</b> | 42.5-62.4 | <b>53.6</b> | 43.6-63.1 |
| <b>Pacific</b>            |   |             |           |             |           |             |            |             |           |             |           |
| Alaska                    | 1 | <b>88.1</b> | 80.1-96.1 | <b>89.6</b> | 80.7-98.6 | —           | —          | <b>94.1</b> | 90.1-98.2 | <b>92.1</b> | 86.5-97.1 |
| (NPCR)                    | 3 | <b>72.2</b> | 61.1-83.4 | <b>73.6</b> | 60.5-86.7 | —           | —          | <b>79.1</b> | 71.0-87.3 | <b>73.1</b> | 62.6-83.1 |
|                           | 5 | <b>70.4</b> | 58.8-82.1 | <b>71.6</b> | 58.1-85.0 | —           | —          | <b>78.2</b> | 69.6-86.8 | <b>73.7</b> | 63.1-84.1 |
| California                | 1 | <b>84.8</b> | 83.5-86.1 | <b>84.1</b> | 82.6-85.6 | <b>80.0</b> | 74.8-85.2  | <b>85.0</b> | 84.1-86.0 | <b>84.7</b> | 83.6-85.1 |
| (NPCR/SEER)               | 3 | <b>70.8</b> | 69.1-72.4 | <b>70.9</b> | 69.0-72.8 | <b>59.1</b> | 52.8-65.3  | <b>70.1</b> | 68.8-71.5 | <b>69.6</b> | 68.1-71.1 |

|            |   |             |           |             |           |             |            |             |           |             |           |
|------------|---|-------------|-----------|-------------|-----------|-------------|------------|-------------|-----------|-------------|-----------|
|            | 5 | <b>65.6</b> | 63.8-67.4 | <b>65.9</b> | 63.8-68.0 | <b>53.8</b> | 47.2-60.3  | <b>65.2</b> | 63.4-67.0 | <b>64.2</b> | 62.1-66.2 |
| Hawaii     | 1 | <b>78.0</b> | 69.9-86.2 | <b>84.0</b> | 71.7-96.2 |             | —          | <b>85.9</b> | 80.8-91.0 | <b>89.9</b> | 82.3-97.4 |
| (SEER)     | 3 | <b>68.1</b> | 59.1-77.1 | <b>73.3</b> | 57.8-88.8 |             | —          | <b>72.0</b> | 65.5-78.6 | <b>75.3</b> | 62.7-87.8 |
|            | 5 | <b>60.3</b> | 50.7-69.8 | <b>65.3</b> | 48.7-81.9 |             | —          | <b>62.9</b> | 53.7-72.2 | <b>58.6</b> | 38.9-78.1 |
| Oregon     | 1 | <b>82.0</b> | 76.9-87.1 | <b>82.7</b> | 77.2-88.3 | <b>65.3</b> | 37.6-93.0  | <b>83.3</b> | 80.0-86.6 | <b>82.9</b> | 79.4-86.4 |
| (NPCR)     | 3 | <b>64.7</b> | 58.9-70.5 | <b>64.8</b> | 58.5-71.1 | <b>37.1</b> | 9.8-64.5   | <b>69.8</b> | 65.4-74.1 | <b>70.0</b> | 65.4-74.1 |
|            | 5 | <b>59.9</b> | 53.7-66.0 | <b>60.9</b> | 54.2-67.6 | <b>37.1</b> | 9.8-64.5   | <b>68.0</b> | 62.8-73.2 | <b>67.8</b> | 62.3-73.2 |
| Washington | 1 | <b>86.3</b> | 82.9-89.7 | <b>85.6</b> | 81.8-89.3 | <b>90.5</b> | 77.6-100.0 | <b>81.3</b> | 78.4-84.2 | <b>80.6</b> | 77.5-83.7 |
| (NPCR)     | 3 | <b>74.5</b> | 70.2-78.8 | <b>74.4</b> | 69.7-79.0 | <b>76.2</b> | 57.5-95.0  | <b>67.2</b> | 63.5-71.0 | <b>67.2</b> | 63.2-71.1 |
|            | 5 | <b>66.1</b> | 61.5-70.7 | <b>66.1</b> | 61.2-71.1 | <b>67.1</b> | 46.2-88.0  | <b>63.3</b> | 58.9-67.7 | <b>63.0</b> | 58.4-67.1 |

Note: NPCR indicates National Program of Cancer Registries; SEER indicates Surveillance, Epidemiology, and End Results program. Unstandardized estimates are italicized. This is the same information that appears in Table 2.

**SUPPORTING TABLE 3. Cervical cancer: 5-year age-standardized net survival (%) for females (15-99 years) diagnosed 2001-2009, by SEER Summary Stage 2000 at diagnosis, race, calendar period of diagnosis and US Census Region and States.**

| Location              | SEER Summary Stage | 2001-2003   |            |             |            |              |             | 2004-2009   |            |             |            |
|-----------------------|--------------------|-------------|------------|-------------|------------|--------------|-------------|-------------|------------|-------------|------------|
|                       |                    | All Races   |            | Whites      |            | Blacks       |             | All Races   |            | Whites      |            |
|                       |                    | NS (%)      | 95% CI     | NS (%)      | 95% CI     | NS (%)       | 95% CI      | NS (%)      | 95% CI     | NS (%)      | 95% CI     |
| <b>UNITED STATES</b>  | All stages         | <b>63.5</b> | 62.8-64.1  | <b>64.0</b> | 63.2-64.7  | <b>56.6</b>  | 55.0-58.2   | <b>62.8</b> | 62.2-63.5  | <b>63.5</b> | 62.7-64.2  |
|                       | Localized          | <b>84.5</b> | 83.4-85.5  | <b>84.9</b> | 83.7-86.0  | <b>79.1</b>  | 76.4-81.7   | <b>85.9</b> | 84.7-87.0  | <b>86.6</b> | 85.3-87.8  |
|                       | Regional           | <b>53.2</b> | 52.1-54.3  | <b>53.6</b> | 52.4-54.9  | <b>47.4</b>  | 44.7-50.1   | <b>55.8</b> | 54.8-56.9  | <b>56.1</b> | 54.9-57.3  |
|                       | Distant            | <b>16.0</b> | 14.6-17.4  | <b>16.3</b> | 14.7-17.9  | <b>13.4</b>  | 10.4-16.4   | <b>16.3</b> | 15.0-17.6  | <b>16.6</b> | 15.1-18.2  |
|                       | Unknown            | <b>58.3</b> | 56.3-60.3  | <b>58.1</b> | 55.8-60.4  | <b>52.3</b>  | 47.9-56.7   | <b>56.2</b> | 54.3-58.2  | <b>56.6</b> | 54.3-58.8  |
| <b>NORTHEAST</b>      |                    |             |            |             |            |              |             |             |            |             |            |
| <b>New England</b>    |                    |             |            |             |            |              |             |             |            |             |            |
| Connecticut           | All stages         | <b>61.8</b> | 56.3-67.3  | <b>63.1</b> | 57.1-69.1  | <b>49.4</b>  | 33.8-65.0   | <b>64.1</b> | 59.1-69.1  | <b>62.4</b> | 56.9-67.8  |
| (SEER)                | Localized          | <b>86.9</b> | 79.4-94.4  | <b>86.2</b> | 78.6-93.9  | <b>100.0</b> | 100.0-100.0 | <b>82.7</b> | 75.4-90.0  | <b>83.6</b> | 75.9-91.4  |
|                       | Regional           | <b>50.0</b> | 41.3-58.6  | <b>50.6</b> | 40.8-60.4  | <b>41.6</b>  | 22.5-60.8   | <b>56.0</b> | 47.4-64.6  | <b>54.0</b> | 45.0-63.1  |
|                       | Distant            | <b>2.3</b>  | 0.0-5.9    | <b>2.6</b>  | 0.0-6.7    |              | —           | <b>14.7</b> | 4.8-24.7   | <b>17.1</b> | 5.8-28.3   |
|                       | Unknown            | <b>85.6</b> | 37.3-100.0 | <b>95.1</b> | 42.8-100.0 |              | —           | <b>53.0</b> | 29.9-76.0  | <b>56.6</b> | 34.9-78.2  |
| Massachusetts         | All stages         | <b>71.8</b> | 67.6-75.9  | <b>68.5</b> | 64.1-73.0  | <b>82.5</b>  | 69.5-95.4   | <b>67.6</b> | 63.6-71.6  | <b>65.1</b> | 60.8-69.4  |
| (NPCR)                | Localized          | <b>91.2</b> | 86.4-96.1  | <b>89.0</b> | 83.3-94.6  | <b>95.6</b>  | 86.7-100.0  | <b>95.4</b> | 90.6-100.0 | <b>94.2</b> | 88.9-99.6  |
|                       | Regional           | <b>59.5</b> | 52.6-66.4  | <b>58.1</b> | 50.7-65.5  | <b>62.8</b>  | 34.9-90.7   | <b>57.0</b> | 50.2-63.9  | <b>54.3</b> | 47.0-61.7  |
|                       | Distant            | <b>22.6</b> | 10.6-34.7  | <b>16.6</b> | 5.6-27.5   |              | —           | <b>23.5</b> | 14.2-32.9  | <b>14.7</b> | 5.9-23.5   |
|                       | Unknown            | <b>32.3</b> | 14.1-50.5  | <b>24.2</b> | 6.2-42.3   |              | —           | <b>40.2</b> | 24.3-56.1  | <b>29.9</b> | 13.2-46.6  |
| New Hampshire         | All stages         | <b>70.4</b> | 61.0-79.9  | <b>70.4</b> | 60.9-79.8  |              | —           | <b>65.1</b> | 56.4-73.9  | <b>65.4</b> | 56.6-74.2  |
| (NPCR)                | Localized          | <b>90.9</b> | 82.7-99.2  | <b>90.8</b> | 82.4-99.1  |              | —           | <b>97.1</b> | 91.4-100.0 | <b>97.1</b> | 91.4-100.0 |
|                       | Regional           | <b>63.9</b> | 50.1-77.7  | <b>63.9</b> | 50.1-77.7  |              | —           | <b>40.5</b> | 29.0-52.0  | <b>40.5</b> | 29.0-52.0  |
|                       | Distant            | <b>14.4</b> | 0.0-30.5   | <b>14.4</b> | 0.0-30.5   |              | —           | <b>14.6</b> | 0.0-30.0   | <b>15.9</b> | 0.0-32.4   |
|                       | Unknown            | <b>44.0</b> | 10.2-77.9  | <b>44.0</b> | 10.2-77.9  |              | —           | <b>76.7</b> | 38.0-100.0 | <b>68.4</b> | 22.7-100.0 |
| Rhode Island          | All stages         | <b>77.5</b> | 69.3-85.8  | <b>77.2</b> | 68.5-85.9  |              | —           | <b>73.9</b> | 65.7-82.0  | <b>71.7</b> | 63.4-80.1  |
| (NPCR)                | Localized          | <b>95.4</b> | 88.8-100.0 | <b>95.0</b> | 88.0-100.0 |              | —           |             | —          |             | —          |
|                       | Regional           | <b>46.9</b> | 27.0-66.8  | <b>45.9</b> | 24.4-67.3  |              | —           |             | —          |             | —          |
|                       | Distant            |             | —          |             | —          |              | —           |             | —          |             | —          |
|                       | Unknown            |             | —          |             | —          |              | —           |             | —          |             | —          |
| <b>Mid Atlantic</b>   |                    |             |            |             |            |              |             |             |            |             |            |
| New Jersey            | All stages         | <b>61.3</b> | 58.2-64.4  | <b>62.2</b> | 58.8-65.7  | <b>52.4</b>  | 45.2-59.5   | <b>63.0</b> | 60.0-66.0  | <b>64.5</b> | 61.0-68.0  |
| (NPCR/SEER)           | Localized          | <b>85.3</b> | 80.0-90.6  | <b>85.8</b> | 79.9-91.7  | <b>77.3</b>  | 67.4-87.2   | <b>85.8</b> | 80.9-90.7  | <b>85.6</b> | 79.9-91.2  |
|                       | Regional           | <b>55.7</b> | 50.7-60.7  | <b>56.4</b> | 50.8-62.0  | <b>48.6</b>  | 38.4-58.9   | <b>54.1</b> | 49.5-58.8  | <b>53.3</b> | 48.4-58.8  |
|                       | Distant            | <b>15.1</b> | 9.9-20.3   | <b>15.2</b> | 9.3-21.2   | <b>15.3</b>  | 3.8-26.9    | <b>14.5</b> | 8.7-20.2   | <b>17.3</b> | 10.9-23.1  |
|                       | Unknown            | <b>56.9</b> | 47.4-66.4  | <b>54.4</b> | 44.0-64.7  | <b>47.8</b>  | 26.5-69.0   | <b>62.1</b> | 52.8-71.5  | <b>70.2</b> | 60.1-80.3  |
| New York              | All stages         | <b>65.2</b> | 63.2-67.3  | <b>63.4</b> | 60.9-65.9  | <b>62.8</b>  | 58.7-66.9   | <b>67.0</b> | 65.0-69.0  | <b>67.4</b> | 65.0-69.8  |
| (NPCR)                | Localized          | <b>83.8</b> | 80.6-87.0  | <b>83.0</b> | 79.1-86.9  | <b>81.3</b>  | 75.1-87.5   | <b>88.8</b> | 85.7-92.0  | <b>88.9</b> | 85.3-92.4  |
|                       | Regional           | <b>56.2</b> | 52.5-59.8  | <b>54.1</b> | 49.7-58.5  | <b>54.4</b>  | 47.6-61.2   | <b>57.3</b> | 53.7-60.9  | <b>57.4</b> | 53.0-61.8  |
|                       | Distant            | <b>16.6</b> | 11.7-21.5  | <b>16.8</b> | 10.8-22.9  | <b>17.8</b>  | 9.0-26.5    | <b>19.8</b> | 15.0-24.6  | <b>24.5</b> | 17.9-31.1  |
|                       | Unknown            | <b>65.0</b> | 59.8-70.2  | <b>57.8</b> | 51.5-64.0  | <b>64.4</b>  | 54.1-74.7   | <b>68.6</b> | 63.1-74.1  | <b>69.6</b> | 63.4-75.5  |
| Pennsylvania          | All stages         | <b>60.1</b> | 57.3-62.9  | <b>61.1</b> | 58.0-64.1  | <b>50.0</b>  | 42.7-57.3   | <b>62.6</b> | 60.0-65.3  | <b>62.9</b> | 60.1-65.8  |
| (NPCR)                | Localized          | <b>82.3</b> | 77.9-86.7  | <b>84.1</b> | 79.4-88.8  | <b>72.4</b>  | 63.7-81.1   | <b>89.2</b> | 84.8-93.5  | <b>90.9</b> | 86.4-95.4  |
|                       | Regional           | <b>47.4</b> | 42.9-51.9  | <b>48.3</b> | 43.3-53.3  | <b>40.4</b>  | 30.0-50.7   | <b>56.2</b> | 51.9-60.5  | <b>56.0</b> | 51.5-60.5  |
|                       | Distant            | <b>9.8</b>  | 5.0-14.5   | <b>9.9</b>  | 4.7-15.0   | <b>4.1</b>   | 0.0-10.4    | <b>16.0</b> | 11.0-20.9  | <b>16.1</b> | 10.7-21.6  |
|                       | Unknown            | <b>52.4</b> | 42.9-62.0  | <b>46.3</b> | 32.5-60.1  |              | —           | <b>54.8</b> | 44.8-64.9  | <b>49.8</b> | 40.4-59.1  |
| <b>SOUTH</b>          |                    |             |            |             |            |              |             |             |            |             |            |
| <b>South Atlantic</b> |                    |             |            |             |            |              |             |             |            |             |            |
| Delaware              | All stages         | <b>59.0</b> | 49.7-68.3  | <b>53.8</b> | 43.5-64.1  | <b>74.1</b>  | 56.5-91.8   | <b>64.8</b> | 56.9-72.7  | <b>63.3</b> | 53.9-72.7  |
| (NPCR)                | Localized          | <b>83.9</b> | 73.4-94.4  | <b>78.3</b> | 64.9-91.7  | <b>95.7</b>  | 84.8-100.0  | <b>83.8</b> | 72.1-95.5  | <b>87.8</b> | 74.5-100.0 |
|                       | Regional           | <b>36.3</b> | 19.6-52.9  | <b>39.3</b> | 20.9-57.8  |              | —           | <b>67.3</b> | 54.3-80.2  | <b>62.0</b> | 42.5-81.4  |



|                           |            |             |           |             |            |             |           |             |           |             |           |
|---------------------------|------------|-------------|-----------|-------------|------------|-------------|-----------|-------------|-----------|-------------|-----------|
|                           | Distant    |             | —         |             | —          |             | —         | <b>23.8</b> | 5.3-42.2  | <b>12.4</b> | 0.0-28.8  |
|                           | Unknown    |             | —         |             | —          |             | —         |             | —         |             | —         |
| Florida                   | All stages | <b>63.4</b> | 61.3-65.5 | <b>63.6</b> | 61.4-65.9  | <b>59.9</b> | 54.8-65.1 | <b>65.2</b> | 63.1-67.4 | <b>65.4</b> | 63.0-67.7 |
| (NPCR)                    | Localized  | <b>84.4</b> | 81.5-87.4 | <b>84.2</b> | 81.0-87.4  | <b>82.6</b> | 74.9-90.2 | <b>86.5</b> | 82.9-90.1 | <b>86.7</b> | 82.7-90.7 |
|                           | Regional   | <b>53.5</b> | 50.1-57.0 | <b>52.4</b> | 48.5-56.3  | <b>53.3</b> | 45.7-60.8 | <b>60.2</b> | 56.7-63.6 | <b>57.3</b> | 53.4-61.2 |
|                           | Distant    | <b>20.9</b> | 15.9-25.8 | <b>19.3</b> | 14.2-24.5  | <b>25.6</b> | 17.0-34.3 | <b>20.8</b> | 16.2-25.5 | <b>21.8</b> | 16.6-27.7 |
|                           | Unknown    | <b>55.0</b> | 49.3-60.8 | <b>58.0</b> | 51.8-64.2  | <b>46.5</b> | 31.4-61.6 | <b>55.9</b> | 49.3-62.6 | <b>58.1</b> | 50.8-65.3 |
| Georgia                   | All stages | <b>61.5</b> | 58.2-64.8 | <b>61.6</b> | 57.4-65.7  | <b>59.0</b> | 53.5-64.6 | <b>56.0</b> | 52.6-59.5 | <b>58.1</b> | 54.0-62.3 |
| (NPCR/SEER)               | Localized  | <b>84.0</b> | 78.6-89.5 | <b>84.1</b> | 77.1-91.0  | <b>81.0</b> | 72.3-89.8 | <b>73.1</b> | 66.7-79.6 | <b>73.5</b> | 66.0-81.0 |
|                           | Regional   | <b>53.9</b> | 48.9-58.8 | <b>53.9</b> | 47.3-60.6  | <b>52.2</b> | 44.3-60.0 | <b>52.3</b> | 47.2-57.4 | <b>50.1</b> | 44.7-55.6 |
|                           | Distant    | <b>10.1</b> | 5.1-15.1  | <b>10.4</b> | 3.9-17.0   | <b>10.9</b> | 1.3-20.5  | <b>12.5</b> | 8.2-16.9  | <b>21.4</b> | 14.7-28.8 |
|                           | Unknown    | <b>54.3</b> | 44.6-63.9 | <b>54.3</b> | 39.6-69.1  | <b>35.9</b> | 13.2-58.5 | <b>53.0</b> | 41.8-64.2 | <b>48.7</b> | 27.9-69.4 |
| Maryland                  | All stages | <b>63.1</b> | 58.6-67.7 | <b>62.6</b> | 56.9-68.4  | <b>59.0</b> | 51.3-66.7 | <b>62.5</b> | 58.1-66.9 | <b>65.3</b> | 60.0-70.7 |
| (NPCR)                    | Localized  |             | —         |             | —          |             | —         |             | —         |             | —         |
|                           | Regional   |             | —         |             | —          |             | —         |             | —         |             | —         |
|                           | Distant    |             | —         |             | —          |             | —         |             | —         |             | —         |
|                           | Unknown    |             | —         |             | —          |             | —         |             | —         |             | —         |
| North Carolina            | All stages | <b>61.7</b> | 57.9-65.4 | <b>63.7</b> | 59.1-68.4  | <b>52.6</b> | 45.9-59.2 | <b>62.4</b> | 59.2-65.7 | <b>65.1</b> | 61.3-69.9 |
| (NPCR)                    | Localized  | <b>79.5</b> | 74.4-84.6 | <b>78.8</b> | 72.4-85.2  | <b>75.9</b> | 67.3-84.4 | <b>84.4</b> | 79.8-89.0 | <b>86.1</b> | 81.4-90.8 |
|                           | Regional   | <b>49.0</b> | 43.1-55.0 | <b>51.2</b> | 44.2-58.3  | <b>39.6</b> | 29.6-49.6 | <b>54.7</b> | 49.2-60.3 | <b>56.1</b> | 49.3-62.9 |
|                           | Distant    | <b>7.3</b>  | 3.0-11.6  | <b>16.3</b> | 6.3-26.4   | <b>0.0</b>  | —         | <b>18.0</b> | 12.2-23.7 | <b>18.9</b> | 12.0-25.8 |
|                           | Unknown    | <b>46.7</b> | 28.8-64.7 | <b>57.4</b> | 33.6-81.1  | <b>30.1</b> | 7.1-53.1  | <b>31.5</b> | 19.1-43.9 | <b>35.1</b> | 20.1-50.1 |
| South Carolina            | All stages | <b>61.5</b> | 56.8-66.1 | <b>62.3</b> | 56.2-68.3  | <b>57.4</b> | 50.3-64.5 | <b>58.8</b> | 53.4-64.2 | <b>61.8</b> | 54.6-69.9 |
| (NPCR)                    | Localized  | <b>79.5</b> | 72.3-86.6 | <b>77.2</b> | 69.9-84.5  | <b>80.7</b> | 70.7-90.8 | <b>69.3</b> | 59.2-79.4 | <b>71.2</b> | 59.1-83.3 |
|                           | Regional   | <b>40.9</b> | 33.4-48.4 | <b>42.1</b> | 31.9-52.3  | <b>36.8</b> | 25.9-47.8 | <b>55.1</b> | 47.1-63.2 | <b>64.8</b> | 55.0-74.6 |
|                           | Distant    | <b>19.2</b> | 6.7-31.7  | <b>23.2</b> | 6.4-39.9   | <b>13.6</b> | 0.0-29.5  | <b>10.3</b> | 0.1-20.4  | <b>13.4</b> | 3.0-23.9  |
|                           | Unknown    | <b>54.2</b> | 37.6-70.9 | <b>60.7</b> | 42.2-79.2  | <b>39.9</b> | 11.0-68.7 | <b>47.6</b> | 37.9-57.2 | <b>44.1</b> | 20.6-67.6 |
| West Virginia             | All stages | <b>60.4</b> | 54.5-66.4 | <b>61.9</b> | 55.8-68.0  | <b>20.5</b> | 0.0-42.6  | <b>57.6</b> | 51.6-63.5 | <b>57.1</b> | 51.2-63.3 |
| (NPCR)                    | Localized  | <b>82.6</b> | 74.1-91.1 | <b>82.4</b> | 73.9-90.9  |             | —         | <b>78.6</b> | 69.3-87.8 | <b>79.1</b> | 69.8-88.4 |
|                           | Regional   | <b>39.2</b> | 29.2-49.2 | <b>41.0</b> | 30.5-51.5  |             | —         | <b>56.1</b> | 45.8-66.4 | <b>55.2</b> | 44.6-65.5 |
|                           | Distant    | <b>13.8</b> | 2.0-25.5  | <b>15.3</b> | 2.4-28.2   |             | —         | <b>13.1</b> | 3.9-22.2  | <b>13.2</b> | 4.0-22.5  |
|                           | Unknown    | <b>56.4</b> | 40.0-72.7 | <b>57.7</b> | 41.2-74.3  |             | —         | <b>52.8</b> | 31.9-73.7 | <b>52.8</b> | 31.9-73.7 |
| <b>East South Central</b> |            |             |           |             |            |             |           |             |           |             |           |
| Alabama                   | All stages | <b>58.7</b> | 54.5-62.9 | <b>61.7</b> | 56.1-67.3  | <b>52.9</b> | 46.2-59.6 | <b>56.4</b> | 51.9-60.8 | <b>57.8</b> | 51.9-63.8 |
| (NPCR)                    | Localized  | <b>77.9</b> | 71.9-83.8 | <b>77.7</b> | 70.2-85.1  | <b>73.5</b> | 64.3-82.8 | <b>82.4</b> | 74.5-90.2 | <b>88.5</b> | 79.4-97.6 |
|                           | Regional   | <b>44.7</b> | 38.0-51.5 | <b>46.8</b> | 38.0-55.6  | <b>42.5</b> | 32.2-52.8 | <b>48.2</b> | 41.9-54.4 | <b>47.3</b> | 39.3-55.3 |
|                           | Distant    | <b>16.3</b> | 8.6-24.0  | <b>15.8</b> | 3.8-27.8   | <b>17.2</b> | 3.9-30.5  | <b>14.8</b> | 7.8-21.8  | <b>13.5</b> | 5.7-21.4  |
|                           | Unknown    | <b>44.3</b> | 24.1-64.5 | <b>57.2</b> | 30.1-84.3  | <b>19.0</b> | 0.0-41.1  | <b>40.0</b> | 25.6-54.4 | <b>36.9</b> | 20.5-53.3 |
| Kentucky                  | All stages | <b>63.9</b> | 59.4-68.3 | <b>65.5</b> | 60.9-70.1  | <b>43.8</b> | 32.9-54.7 | <b>60.9</b> | 56.7-65.1 | <b>60.4</b> | 56.0-64.8 |
| (NPCR/SEER)               | Localized  | <b>81.1</b> | 74.0-88.3 | <b>84.0</b> | 77.0-91.0  | <b>59.9</b> | 39.3-80.6 | <b>85.7</b> | 78.7-92.6 | <b>83.6</b> | 76.2-91.1 |
|                           | Regional   | <b>54.7</b> | 47.4-62.0 | <b>55.4</b> | 47.7-63.2  | <b>49.6</b> | 28.4-70.9 | <b>52.5</b> | 46.2-58.7 | <b>52.7</b> | 46.3-59.2 |
|                           | Distant    | <b>22.7</b> | 12.4-32.9 | <b>24.7</b> | 13.3-36.1  | <b>10.8</b> | 0.0-26.4  | <b>10.7</b> | 5.7-15.6  | <b>11.7</b> | 6.2-17.2  |
|                           | Unknown    | <b>64.7</b> | 48.8-80.6 | <b>67.6</b> | 51.8-83.4  |             | —         | <b>47.7</b> | 28.3-67.1 | <b>39.5</b> | 18.8-60.8 |
| Mississippi               | All stages | <b>55.7</b> | 46.9-64.6 | <b>73.2</b> | 61.5-84.9  | <b>52.3</b> | 38.7-66.0 | <b>53.6</b> | 48.4-58.7 | <b>60.3</b> | 53.6-67.1 |
| (NPCR)                    | Localized  | <b>80.4</b> | 69.6-91.1 | <b>88.5</b> | 76.8-100.0 | <b>67.7</b> | 48.3-87.1 | <b>75.7</b> | 67.6-83.7 | <b>80.6</b> | 72.2-89.0 |
|                           | Regional   | <b>65.5</b> | 47.2-83.7 | <b>65.5</b> | 41.4-89.7  | <b>59.8</b> | 33.0-86.6 | <b>49.9</b> | 42.5-57.2 | <b>61.6</b> | 51.6-71.6 |
|                           | Distant    | <b>0.0</b>  | —         |             | —          | <b>0.0</b>  | —         | <b>14.2</b> | 7.9-20.5  | <b>11.9</b> | 2.6-21.3  |
|                           | Unknown    | <b>58.5</b> | 31.9-85.1 |             | —          | <b>50.2</b> | 21.1-79.2 | <b>43.6</b> | 22.2-65.1 | <b>49.5</b> | 27.6-71.3 |
| Tennessee                 | All stages | <b>60.7</b> | 54.0-67.3 | <b>65.1</b> | 57.9-72.4  | <b>50.9</b> | 36.3-65.5 | <b>59.5</b> | 55.4-63.6 | <b>62.9</b> | 58.3-67.5 |
| (NPCR)                    | Localized  | <b>81.7</b> | 74.0-89.5 | <b>86.3</b> | 78.7-94.0  | <b>64.0</b> | 44.3-83.8 | <b>76.3</b> | 69.5-83.1 | <b>78.6</b> | 71.2-86.0 |
|                           | Regional   | <b>46.0</b> | 37.6-54.5 | <b>47.1</b> | 37.6-56.6  | <b>51.1</b> | 26.5-75.6 | <b>55.5</b> | 49.7-61.3 | <b>58.2</b> | 51.6-64.8 |
|                           | Distant    | <b>25.1</b> | 8.5-41.7  | <b>25.7</b> | 7.3-44.1   |             | —         | <b>8.1</b>  | 3.3-12.8  | <b>6.8</b>  | 0.0-13.9  |
|                           | Unknown    |             | —         |             | —          |             | —         | <b>56.1</b> | 45.0-67.3 | <b>51.5</b> | 23.8-79.2 |
| <b>West South Central</b> |            |             |           |             |            |             |           |             |           |             |           |
| Louisiana                 | All stages | <b>57.3</b> | 52.6-62.0 | <b>60.9</b> | 54.4-67.4  | <b>52.3</b> | 45.5-59.1 | <b>52.7</b> | 47.5-57.8 | <b>55.1</b> | 48.6-61.6 |
| (NPCR/SEER)               | Localized  | <b>80.3</b> | 72.9-87.7 | <b>90.5</b> | 85.8-95.2  | <b>76.4</b> | 67.7-85.2 | <b>70.7</b> | 62.1-79.4 | <b>76.2</b> | 67.0-85.5 |
|                           | Regional   | <b>46.5</b> | 39.7-53.3 | <b>43.9</b> | 35.6-52.3  | <b>49.7</b> | 40.0-59.4 | <b>49.5</b> | 41.9-57.1 | <b>48.0</b> | 39.1-57.0 |
|                           | Distant    | <b>10.3</b> | 4.7-15.9  | <b>17.5</b> | 4.3-30.7   | <b>8.9</b>  | 1.0-16.8  | <b>17.5</b> | 10.7-24.3 | <b>15.9</b> | 0.0-33.0  |
|                           | Unknown    | <b>53.5</b> | 32.6-74.5 | <b>55.8</b> | 27.0-84.7  | <b>55.7</b> | 25.9-85.5 | <b>34.3</b> | 19.0-49.5 | <b>30.8</b> | 11.2-50.4 |
| Oklahoma                  | All stages | <b>58.7</b> | 53.4-64.0 | <b>59.0</b> | 53.2-64.7  | <b>52.5</b> | 37.6-67.4 | <b>64.0</b> | 58.8-69.2 | <b>64.7</b> | 58.9-70.6 |
| (NPCR)                    | Localized  | <b>74.6</b> | 67.4-81.7 | <b>72.3</b> | 64.4-80.2  | <b>74.2</b> | 54.9-93.6 | <b>88.2</b> | 80.0-96.4 | <b>88.1</b> | 78.6-97.6 |
|                           | Regional   | <b>58.3</b> | 50.1-66.5 | <b>60.6</b> | 51.4-69.8  | <b>43.4</b> | 20.3-66.6 | <b>61.0</b> | 53.8-68.2 | <b>61.8</b> | 53.7-69.9 |
|                           | Distant    | <b>10.6</b> | 3.0-18.3  | <b>11.8</b> | 2.6-21.0   |             | —         | <b>17.9</b> | 11.7-24.2 | <b>17.8</b> | 11.0-24.4 |
|                           | Unknown    | <b>29.2</b> | 12.3-46.1 | <b>27.8</b> | 9.4-46.2   |             | —         | <b>65.4</b> | 54.5-76.3 | <b>68.1</b> | 55.5-80.7 |
| Texas                     | All stages | <b>63.5</b> | 61.4-65.6 | <b>64.0</b> | 61.6-66.3  | <b>56.0</b> | 50.4-61.7 | <b>62.8</b> | 60.7-64.9 | <b>63.8</b> | 61.5-66.2 |
| (NPCR)                    | Localized  | <b>82.6</b> | 79.5-85.7 | <b>82.1</b> | 78.7-85.5  | <b>78.2</b> | 70.3-86.1 | <b>85.3</b> | 81.3-89.3 | <b>85.1</b> | 80.5-89.9 |
|                           | Regional   | <b>51.6</b> | 47.9-55.3 | <b>52.1</b> | 48.1-56.2  | <b>42.2</b> | 33.1-51.2 | <b>55.4</b> | 51.9-58.8 | <b>56.3</b> | 52.5-60.1 |

|                           |            |      |            |      |            |      |           |      |            |      |            |
|---------------------------|------------|------|------------|------|------------|------|-----------|------|------------|------|------------|
|                           | Distant    | 16.7 | 12.4-21.0  | 18.5 | 13.6-23.4  | 7.3  | 0.0-14.7  | 16.6 | 13.2-20.1  | 15.8 | 12.0-19.7  |
|                           | Unknown    | 63.2 | 57.9-68.4  | 66.1 | 60.2-72.0  | 49.2 | 35.8-62.7 | 65.0 | 59.9-70.1  | 67.3 | 61.8-72.7  |
| <b>MIDWEST</b>            |            |      |            |      |            |      |           |      |            |      |            |
| <b>East North Central</b> |            |      |            |      |            |      |           |      |            |      |            |
| Michigan                  | All stages | 64.4 | 61.1-67.6  | 65.5 | 61.8-69.1  | 55.0 | 48.0-62.0 | 59.9 | 56.7-63.1  | 60.7 | 57.0-64.4  |
| (NPCR)                    | Localized  | 84.0 | 78.9-89.1  | 84.9 | 79.1-90.6  | 78.5 | 70.3-86.7 | 84.7 | 79.6-89.9  | 83.3 | 77.4-89.2  |
|                           | Regional   | 57.9 | 52.1-63.8  | 61.5 | 54.8-68.2  | 44.5 | 34.7-54.2 | 55.2 | 48.7-61.6  | 56.4 | 49.6-63.2  |
|                           | Distant    | 12.6 | 7.2-18.0   | 12.2 | 6.0-18.3   | 16.3 | 2.6-30.0  | 12.5 | 7.6-17.4   | 14.7 | 8.9-20.6   |
|                           | Unknown    | 61.3 | 53.6-69.1  | 60.1 | 51.5-68.7  | 48.9 | 28.6-69.3 | 50.3 | 44.9-55.7  | 49.9 | 43.3-56.4  |
| Ohio                      | All stages | 60.0 | 57.0-62.9  | 60.9 | 57.7-64.2  | 48.2 | 40.4-56.0 | 58.0 | 55.1-60.8  | 58.2 | 55.0-61.3  |
| (NPCR)                    | Localized  | 80.8 | 76.1-85.6  | 82.4 | 77.4-87.4  | 73.4 | 62.5-84.3 | 85.6 | 80.9-90.3  | 86.6 | 81.5-91.8  |
|                           | Regional   | 47.5 | 42.4-52.7  | 49.1 | 43.5-54.7  | 40.4 | 26.9-54.0 | 48.5 | 43.6-53.4  | 49.7 | 44.5-54.9  |
|                           | Distant    | 10.7 | 5.6-15.8   | 8.6  | 3.6-13.5   | 24.8 | 5.2-44.4  | 9.3  | 4.5-14.1   | 8.5  | 3.8-13.2   |
|                           | Unknown    | 49.1 | 41.2-56.9  | 46.5 | 38.1-55.0  | 35.9 | 14.6-57.2 | 34.7 | 26.0-43.4  | 32.0 | 22.5-41.5  |
| Wisconsin                 | All stages | 67.8 | 63.0-72.6  | 70.1 | 65.1-75.1  | 59.9 | 45.2-74.5 | 66.6 | 61.4-71.7  | 66.0 | 60.0-72.0  |
| (NPCR)                    | Localized  |      | —          |      | —          |      | —         |      | —          |      | —          |
|                           | Regional   |      | —          |      | —          |      | —         |      | —          |      | —          |
|                           | Distant    |      | —          |      | —          |      | —         |      | —          |      | —          |
|                           | Unknown    |      | —          |      | —          |      | —         |      | —          |      | —          |
| <b>West North Central</b> |            |      |            |      |            |      |           |      |            |      |            |
| Iowa                      | All stages | 61.1 | 55.5-66.6  | 60.0 | 54.3-65.7  |      | —         | 62.9 | 56.7-69.0  | 63.3 | 56.7-69.8  |
| (SEER)                    | Localized  | 81.0 | 73.0-89.0  | 79.0 | 70.9-87.2  |      | —         | 85.4 | 76.7-94.1  | 87.3 | 78.4-96.2  |
|                           | Regional   | 57.8 | 49.0-66.6  | 56.6 | 47.6-65.7  |      | —         | 61.1 | 52.3-70.0  | 62.6 | 53.3-71.9  |
|                           | Distant    | 13.5 | 3.9-23.2   | 14.1 | 4.1-24.2   |      | —         | 22.0 | 12.6-31.5  | 22.5 | 12.9-32.2  |
|                           | Unknown    | 29.6 | 8.9-50.3   | 29.6 | 8.9-50.3   |      | —         | 28.7 | 4.0-53.5   | 30.2 | 4.3-56.1   |
| Nebraska                  | All stages | 63.2 | 56.0-70.4  | 63.7 | 56.3-71.1  |      | —         | 64.5 | 56.8-72.3  | 64.8 | 56.8-72.8  |
| (NPCR)                    | Localized  | 85.4 | 77.2-93.7  | 85.0 | 76.7-93.3  |      | —         | 91.2 | 83.5-98.9  | 91.4 | 83.7-99.1  |
|                           | Regional   | 54.5 | 45.7-63.3  | 54.2 | 44.7-63.6  |      | —         | 51.7 | 41.3-62.2  | 53.0 | 42.5-63.5  |
|                           | Distant    | 12.7 | 0.3-25.0   | 13.8 | 0.5-27.2   |      | —         | 27.5 | 13.6-41.5  | 25.7 | 11.8-39.7  |
|                           | Unknown    |      | —          |      | —          |      | —         | 44.7 | 19.0-70.4  | 40.6 | 12.9-68.2  |
| <b>WEST</b>               |            |      |            |      |            |      |           |      |            |      |            |
| <b>Mountain</b>           |            |      |            |      |            |      |           |      |            |      |            |
| Colorado                  | All stages | 68.6 | 63.5-73.8  | 67.9 | 62.5-73.4  | 58.1 | 33.9-82.3 | 65.4 | 60.1-70.6  | 63.7 | 58.0-69.8  |
| (NPCR)                    | Localized  | 92.9 | 87.8-98.0  | 92.3 | 86.8-97.9  |      | —         | 88.3 | 79.0-97.5  | 86.9 | 77.5-96.3  |
|                           | Regional   | 57.5 | 49.0-65.9  | 57.4 | 48.6-66.2  |      | —         | 58.1 | 50.3-65.8  | 58.3 | 50.0-66.6  |
|                           | Distant    | 16.3 | 5.6-27.1   | 15.3 | 4.4-26.1   |      | —         | 25.7 | 15.6-35.7  | 23.6 | 15.2-31.9  |
|                           | Unknown    | 78.3 | 63.2-93.5  | 72.6 | 54.5-90.8  |      | —         | 60.4 | 41.4-79.4  | 52.3 | 28.5-76.1  |
| Idaho                     | All stages | 64.8 | 55.9-73.7  | 63.9 | 54.9-72.9  |      | —         | 68.3 | 59.4-77.2  | 68.0 | 58.9-77.1  |
| (NPCR)                    | Localized  | 94.0 | 88.0-100.0 | 93.7 | 87.4-100.0 |      | —         | 91.5 | 81.4-100.0 | 91.5 | 81.3-100.0 |
|                           | Regional   | 55.3 | 39.2-71.4  | 53.4 | 37.1-69.7  |      | —         | 68.3 | 55.9-80.8  | 68.1 | 55.4-80.7  |
|                           | Distant    | 8.4  | 0.0-20.7   | 8.4  | 0.0-20.7   |      | —         | 17.6 | 1.9-33.4   | 13.7 | 0.0-28.4   |
|                           | Unknown    |      | —          |      | —          |      | —         |      | —          |      | —          |
| Montana                   | All stages | 64.9 | 55.1-74.7  | 67.1 | 56.8-77.3  |      | —         | 63.7 | 53.7-73.7  | 63.4 | 52.8-73.9  |
| (NPCR)                    | Localized  | 83.6 | 70.1-97.2  | 85.4 | 71.9-99.0  |      | —         | 88.0 | 75.8-100.0 | 86.7 | 73.5-99.8  |
|                           | Regional   | 65.1 | 49.3-81.0  | 66.7 | 50.1-83.3  |      | —         | 48.2 | 34.4-61.9  | 51.5 | 38.2-64.8  |
|                           | Distant    |      | —          |      | —          |      | —         | 27.6 | 8.4-46.8   | 31.4 | 10.4-52.4  |
|                           | Unknown    |      | —          |      | —          |      | —         |      | —          |      | —          |
| New Mexico                | All stages | 61.7 | 54.8-68.5  | 59.9 | 53.0-66.9  |      | —         | 53.7 | 46.5-60.9  | 56.0 | 48.3-63.3  |
| (SEER)                    | Localized  | 88.5 | 82.0-94.9  | 87.6 | 80.7-94.5  |      | —         | 74.7 | 63.6-85.7  | 72.3 | 61.1-83.3  |
|                           | Regional   | 52.0 | 41.4-62.5  | 50.9 | 37.8-63.9  |      | —         | 44.7 | 34.7-54.7  | 48.7 | 37.7-59.8  |
|                           | Distant    | 13.7 | 0.1-27.2   | 9.3  | 0.0-20.5   |      | —         | 10.2 | 1.1-19.3   | 14.4 | 3.4-25.5   |
|                           | Unknown    | 68.6 | 44.6-92.7  | 72.9 | 48.8-97.1  |      | —         | 65.3 | 43.7-87.0  | 55.6 | 30.9-80.2  |
| Utah                      | All stages | 61.9 | 53.9-69.9  | 61.3 | 53.0-69.5  |      | —         | 61.3 | 54.0-68.6  | 62.5 | 55.0-69.9  |
| (SEER)                    | Localized  | 91.5 | 85.3-97.7  | 90.9 | 84.4-97.4  |      | —         | 91.0 | 84.1-97.9  | 91.6 | 84.5-98.6  |
|                           | Regional   | 65.3 | 50.6-80.1  | 64.4 | 48.9-79.9  |      | —         | 56.9 | 46.9-66.9  | 57.8 | 47.6-68.6  |
|                           | Distant    | 6.1  | 0.0-15.4   | 6.5  | 0.0-16.4   |      | —         | 0.0  | 0.0-0.0    | 0.0  | 0.0-0.0    |
|                           | Unknown    |      | —          |      | —          |      | —         |      | —          |      | —          |
| Wyoming                   | All stages | 74.2 | 62.3-86.2  | 73.2 | 61.1-85.3  |      | —         | 52.5 | 42.5-62.4  | 53.6 | 43.6-63.6  |
| (NPCR)                    | Localized  | 94.6 | 85.5-100.0 | 94.6 | 85.5-100.0 |      | —         | 86.9 | 77.1-96.7  | 88.3 | 78.6-97.9  |
|                           | Regional   | 60.3 | 38.4-82.2  | 56.6 | 34.6-78.7  |      | —         | 39.3 | 14.7-63.9  | 39.3 | 14.7-63.9  |
|                           | Distant    |      | —          |      | —          |      | —         | 35.4 | 10.8-60.0  | 39.8 | 14.2-65.5  |
|                           | Unknown    |      | —          |      | —          |      | —         |      | —          |      | —          |
| <b>Pacific</b>            |            |      |            |      |            |      |           |      |            |      |            |
| Alaska                    | All stages | 70.4 | 58.8-82.1  | 71.6 | 58.1-85.0  |      | —         | 78.2 | 69.6-86.8  | 73.7 | 63.1-84.3  |
| (NPCR)                    | Localized  | 85.8 | 73.6-98.1  | 88.2 | 74.8-100.0 |      | —         | 98.3 | 93.7-100.0 | 96.2 | 89.2-100.0 |
|                           | Regional   | 46.2 | 24.7-67.6  | 47.3 | 23.0-71.6  |      | —         | 69.8 | 52.5-87.2  | 67.0 | 46.7-87.4  |
|                           | Distant    |      | —          |      | —          |      | —         | 11.6 | 0.0-27.4   | 17.7 | 0.0-37.0   |



|             |            |             |           |             |            |             |            |             |            |              |             |
|-------------|------------|-------------|-----------|-------------|------------|-------------|------------|-------------|------------|--------------|-------------|
|             | Unknown    |             | —         |             | —          |             | —          | <b>87.4</b> | 63.0-100.0 |              | —           |
| California  | All stages | <b>65.6</b> | 63.8-67.4 | <b>65.9</b> | 63.8-68.0  | <b>53.8</b> | 47.2-60.3  | <b>65.2</b> | 63.4-67.0  | <b>64.2</b>  | 62.1-66.3   |
| (NPCR/SEER) | Localized  | <b>90.8</b> | 88.2-93.4 | <b>91.8</b> | 88.9-94.8  | <b>87.9</b> | 80.9-94.9  | <b>89.0</b> | 85.9-92.0  | <b>89.4</b>  | 85.9-92.9   |
|             | Regional   | <b>55.8</b> | 52.9-58.8 | <b>56.7</b> | 53.4-60.0  | <b>40.1</b> | 30.4-49.7  | <b>57.6</b> | 54.7-60.4  | <b>56.9</b>  | 53.6-60.7   |
|             | Distant    | <b>18.9</b> | 15.5-22.3 | <b>19.2</b> | 15.3-23.0  | <b>13.8</b> | 3.1-24.4   | <b>16.7</b> | 13.4-20.0  | <b>15.1</b>  | 11.9-18.2   |
|             | Unknown    | <b>41.0</b> | 32.6-49.4 | <b>39.8</b> | 30.0-49.6  | <b>23.5</b> | 2.0-45.0   | <b>47.1</b> | 38.7-55.5  | <b>43.1</b>  | 33.7-52.9   |
| Hawaii      | All stages | <b>60.3</b> | 50.7-69.8 | <b>65.3</b> | 48.7-81.9  |             | —          | <b>62.9</b> | 53.7-72.2  | <b>58.6</b>  | 38.9-78.3   |
| (SEER)      | Localized  | <b>83.5</b> | 74.6-92.4 | <b>85.8</b> | 69.5-100.0 |             | —          | <b>99.9</b> | 97.1-100.0 | <b>100.0</b> | 100.0-100.0 |
|             | Regional   | <b>53.8</b> | 37.0-70.7 |             | —          |             | —          | <b>38.9</b> | 28.0-49.8  | <b>13.5</b>  | 0.0-31.5    |
|             | Distant    | <b>15.1</b> | 0.7-29.5  |             | —          |             | —          | <b>20.8</b> | 4.6-37.1   |              | —           |
|             | Unknown    |             | —         |             | —          |             | —          | <b>15.7</b> | 0.0-37.4   |              | —           |
| Oregon      | All stages | <b>59.9</b> | 53.7-66.0 | <b>60.9</b> | 54.2-67.6  | <b>37.1</b> | 9.8-64.5   | <b>68.0</b> | 62.8-73.2  | <b>67.8</b>  | 62.3-73.3   |
| (NPCR)      | Localized  | <b>89.3</b> | 84.5-94.1 | <b>89.2</b> | 84.2-94.3  |             | —          | <b>88.3</b> | 79.9-96.7  | <b>88.8</b>  | 80.0-97.6   |
|             | Regional   | <b>48.4</b> | 39.6-57.2 | <b>56.7</b> | 47.2-66.1  |             | —          | <b>65.8</b> | 58.1-73.5  | <b>63.5</b>  | 55.2-71.7   |
|             | Distant    | <b>19.0</b> | 5.5-32.5  | <b>18.1</b> | 4.1-32.2   |             | —          | <b>16.9</b> | 5.7-28.1   | <b>18.6</b>  | 6.4-30.8    |
|             | Unknown    |             | —         |             | —          |             | —          | <b>32.2</b> | 10.9-53.4  | <b>29.6</b>  | 7.4-51.8    |
| Washington  | All stages | <b>66.1</b> | 61.5-70.7 | <b>66.1</b> | 61.2-71.1  | <b>67.1</b> | 46.2-88.0  | <b>63.3</b> | 58.9-67.7  | <b>63.0</b>  | 58.4-67.6   |
| (NPCR)      | Localized  | <b>84.8</b> | 77.7-91.8 | <b>85.1</b> | 77.7-92.5  | <b>76.3</b> | 52.4-100.0 | <b>92.1</b> | 84.1-100.0 | <b>90.0</b>  | 81.5-98.5   |
|             | Regional   | <b>56.3</b> | 49.6-63.0 | <b>55.1</b> | 48.1-62.2  |             | —          | <b>63.7</b> | 57.2-70.2  | <b>64.9</b>  | 58.0-71.9   |
|             | Distant    | <b>29.2</b> | 18.9-39.5 | <b>29.3</b> | 18.3-40.3  |             | —          | <b>18.8</b> | 12.0-25.6  | <b>17.9</b>  | 11.0-24.8   |
|             | Unknown    | <b>62.0</b> | 36.5-87.5 | <b>67.2</b> | 41.5-92.8  |             | —          | <b>57.4</b> | 36.5-78.3  | <b>51.3</b>  | 28.9-73.7   |

Note: NPCR indicates National Program of Cancer Registries; SEER indicates Surveillance, Epidemiology, and End Results program. Information on stage was not available for two states (Maryland and Wisconsin), or for Rhode Island for cases diagnosed inbetween 2004–2009. Unstandardized estimates are italicized. This is the same information that appears in Table 3.
